# Supplementary material
Source: MDPI journal article supplement (https://www.mdpi.com/search?q=plants-08-00348)
Supplement: s001 [file plants-08-00348-s001.pdf]

**Table S1.** List of enzymes investigated in this work accompanied with reactions they catalyse, their EC numbers and genes in soybean that encode proteins related to these specific EC functions. Soybean genome annotation v1.1 was searched for specific enzyme functions (by using EC no as search string) and genes encoding related proteins were listed. Reactions related to specific EC functions were taken from EXPASY database.

| <b>Enzyme/Reaction catalysed</b>                                                                                                    | <b>E.C. no</b> | <b>Genes related to function</b>                                                                                                                                                                                                                                                                                                                                                                                                                                                                                                                                                                               |
|-------------------------------------------------------------------------------------------------------------------------------------|----------------|----------------------------------------------------------------------------------------------------------------------------------------------------------------------------------------------------------------------------------------------------------------------------------------------------------------------------------------------------------------------------------------------------------------------------------------------------------------------------------------------------------------------------------------------------------------------------------------------------------------|
| Superoxide dismutase (SOD)<br>2 superoxide + 2H <sup>+</sup> <=> O <sub>2</sub> + H <sub>2</sub> O <sub>2</sub>                     | 1.15.1.1       | Glyma03g40280,<br>Glyma04g39930,<br>Glyma06g14960,<br>Glyma11g19840,<br>Glyma12g08650,<br>Glyma12g30260,<br>Glyma16g27020,<br>Glyma19g42890                                                                                                                                                                                                                                                                                                                                                                                                                                                                    |
| Catalase (CAT)<br>2 H <sub>2</sub> O <sub>2</sub> <=> O <sub>2</sub> + 2 H <sub>2</sub> O                                           | 1.11.1.6       | Glyma04g01920,<br>Glyma06g02040,<br>Glyma14g39810,<br>Glyma17g38140                                                                                                                                                                                                                                                                                                                                                                                                                                                                                                                                            |
| Peroxidase (POX)<br>2 phenolic donor + H <sub>2</sub> O <sub>2</sub> <=> 2<br>phenoxyl radical of the donor + 2<br>H <sub>2</sub> O | 1.11.1.7       | Glyma01g09650,<br>Glyma01g37630,<br>Glyma01g39080,<br>Glyma01g39990,<br>Glyma02g14090,<br>Glyma02g15280,<br>Glyma02g15290,<br>Glyma03g01010,<br>Glyma03g01020,<br>Glyma03g30180,<br>Glyma04g39860,<br>Glyma05g22180,<br>Glyma06g06350,<br>Glyma06g15030,<br>Glyma06g28890,<br>Glyma07g33180,<br>Glyma07g36580,<br>Glyma07g39020,<br>Glyma07g39290,<br>Glyma08g09310,<br>Glyma08g19180,<br>Glyma08g40280,<br>Glyma09g00480,<br>Glyma09g02600,<br>Glyma09g02610,<br>Glyma09g06350,<br>Glyma09g07550,<br>Glyma09g16810,<br>Glyma09g27390,<br>Glyma09g28460,<br>Glyma10g05800,<br>Glyma10g36680,<br>Glyma10g38520, |

|                                                                                                                                                                                                            |           |                                                                                                                                                                                                                                                                                                                                                                                                                                                                                                                                                                                                                                                                                                                                                                                                                                                                                              |
|------------------------------------------------------------------------------------------------------------------------------------------------------------------------------------------------------------|-----------|----------------------------------------------------------------------------------------------------------------------------------------------------------------------------------------------------------------------------------------------------------------------------------------------------------------------------------------------------------------------------------------------------------------------------------------------------------------------------------------------------------------------------------------------------------------------------------------------------------------------------------------------------------------------------------------------------------------------------------------------------------------------------------------------------------------------------------------------------------------------------------------------|
|                                                                                                                                                                                                            |           | <p>Glyma11g05300,<br/> Glyma11g06180,<br/> Glyma11g07670,<br/> Glyma11g10750,<br/> Glyma11g30010,<br/> Glyma12g32160,<br/> Glyma12g32170,<br/> Glyma12g37060,<br/> Glyma13g00790,<br/> Glyma13g04590,<br/> Glyma13g16590,<br/> Glyma13g20170,<br/> Glyma13g23620,<br/> Glyma13g24110,<br/> Glyma13g38300,<br/> Glyma13g38310,<br/> Glyma13g42140,<br/> Glyma14g07730,<br/> Glyma14g12170,<br/> Glyma14g40150,<br/> Glyma15g03250,<br/> Glyma15g05810,<br/> Glyma15g05820,<br/> Glyma15g13500,<br/> Glyma15g13510,<br/> Glyma15g13550,<br/> Glyma15g16710,<br/> Glyma15g17620,<br/> Glyma16g06030,<br/> Glyma16g33250,<br/> Glyma17g01440,<br/> Glyma17g01720,<br/> Glyma17g04030,<br/> Glyma17g06080,<br/> Glyma17g06090,<br/> Glyma17g06890,<br/> Glyma17g33730,<br/> Glyma17g37240,<br/> Glyma18g06210,<br/> Glyma19g01620,<br/> Glyma20g30910,<br/> Glyma20g31190,<br/> Glyma20g33340</p> |
| <p>Ascorbate peroxidase (APX)<br/> <math>2 \text{ L-ascorbate} + \text{H}_2\text{O}_2 + 2 \text{ H}^+ \rightleftharpoons \text{L-ascorbate} + \text{L-dehydroascorbate} + 2 \text{ H}_2\text{O}</math></p> | 1.11.1.11 | <p>Glyma02g37160,<br/> Glyma04g42720,<br/> Glyma06g07180,<br/> Glyma06g12020,<br/> Glyma11g11460,<br/> Glyma11g15680,<br/> Glyma12g03610</p>                                                                                                                                                                                                                                                                                                                                                                                                                                                                                                                                                                                                                                                                                                                                                 |
| <p>Glutathione reductase (GR)</p>                                                                                                                                                                          | 1.8.1.7   | <p>Glyma02g08180,<br/> Glyma02g16010,</p>                                                                                                                                                                                                                                                                                                                                                                                                                                                                                                                                                                                                                                                                                                                                                                                                                                                    |

|                                                                        |  |                                 |
|------------------------------------------------------------------------|--|---------------------------------|
| glutathione disulfide + NADPH<br><=> 2 glutathione + NADP <sup>+</sup> |  | Glyma10g03740,<br>Glyma16g27210 |
|------------------------------------------------------------------------|--|---------------------------------|
